# Supplementary material
Source: ML conference proceedings conference paper supplement (https://proceedings.neurips.cc/paper_files/paper/2022/hash/eeb57fdf745eb31a3c7ef22c59a4661d-Abstract.html)
Supplement: Supplementary file 1 [file eeb57fdf745eb31a3c7ef22c59a4661d-Supplemental-Conference.zip]

Archive with 4 entries (4 files):
- supplementary_material.pdf
- __MACOSX/._supplementary_material.pdf
- supplementary_video.mp4
- __MACOSX/._supplementary_video.mp4
